# Supplementary material
Source: MDPI journal article supplement (https://www.mdpi.com/2311-7524/9/2/261)
Supplement: s1 [file s1]

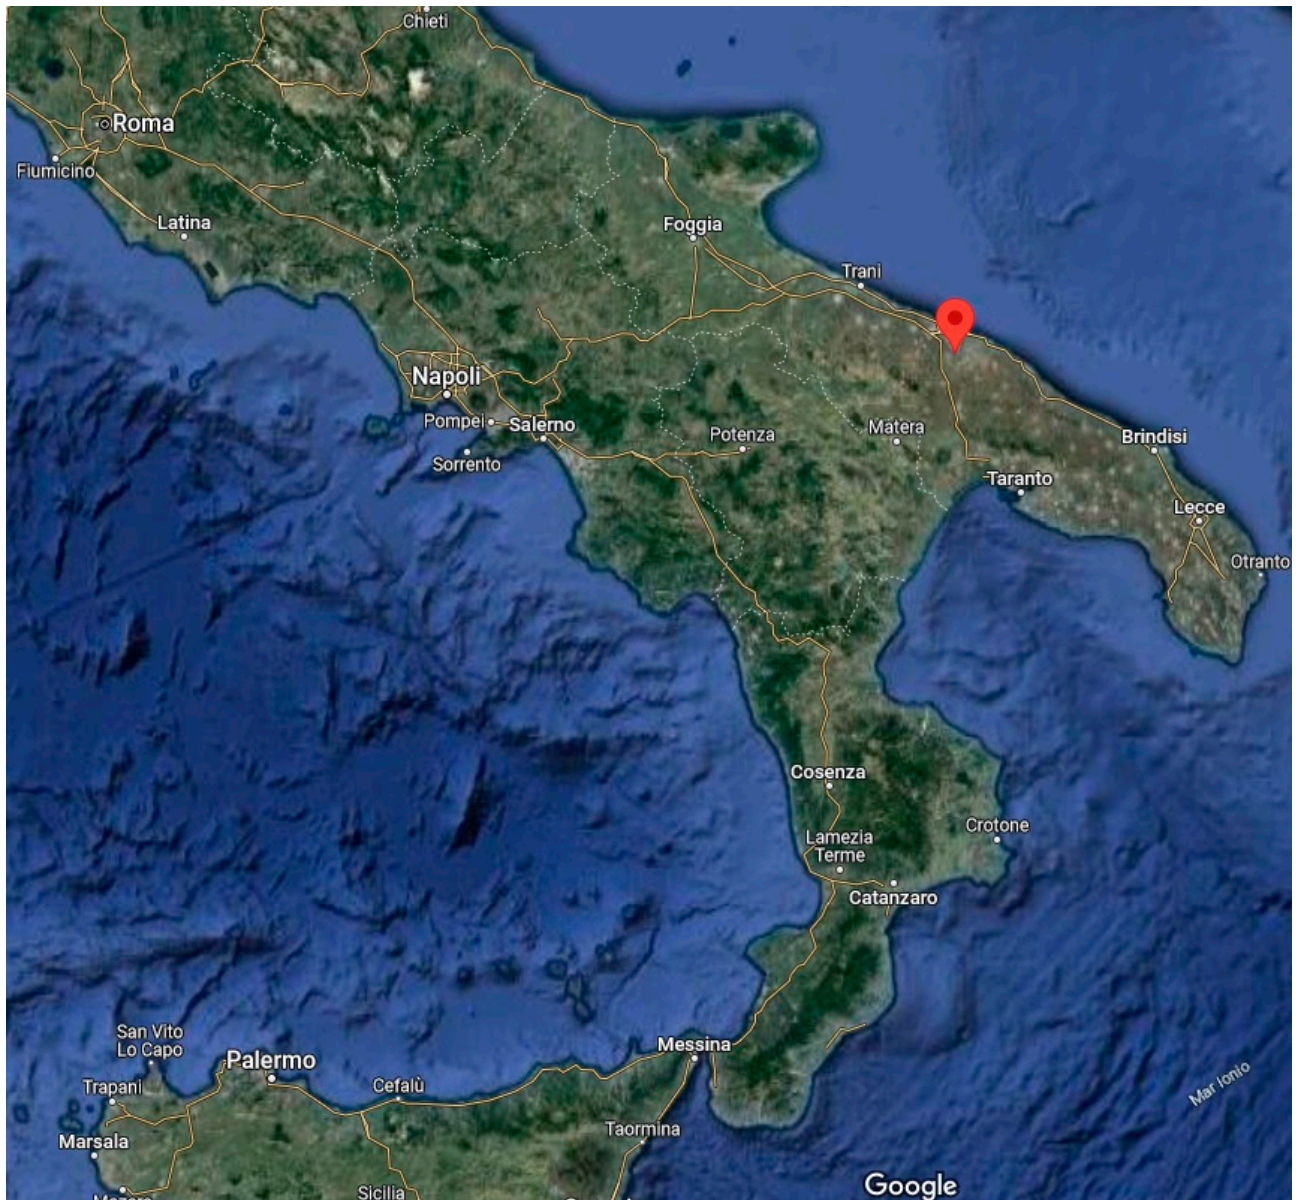

**Figure S1.** The geographical location of the pecan repository in the Puglia region, Southeastern Italy (from Google maps).
